# Supplementary material for: Perception of opioids among medical students: unveiling the complexities and implications
Source: publisher site journal article supplement (doi:10.1515/jom-2023-0176), 2024-01-30
Supplement: Supplementary file 1 [file j_jom-2023-0176_suppl_001.docx]

Appendix A. Opioid Impact, Beliefs, and Experiences Survey

To the best of your knowledge, please indicate whether each item below is true or false.

1. America has 5% of the world’s population but uses 90% of the world’s opioids.

a. True

b. False

2. Most heroin addicts began by abusing prescription opioids.

a. True

b. False

3. The increased use in heroin is a result of over-prescribing of opioid analgesics.

a. True

b. False

4. Opioids must be used long term to cause addiction.

a. True

b. False

5. Only individuals with a family history of substance abuse are at risk of opioid addiction.

a. True

b. False

6. Benzodiazepines are contraindicated for patients taking opioids.

a. True

b. False

7. Patients taking oxycodone while starting a selective serotonin reuptake inhibitor (SSRI) antidepressant may report a reduction in pain relief from the opioid.

a. True

b. False

8. When used to treat opioid addiction, methadone needs to be prescribed (administered) once per day.

a. True

b. False

9. Only people with mental health issues (e.g., anxiety, depression, post-traumatic stress) are at risk of opioid addiction.

a. True

b. False

**For each item, please select your level of agreement.**

10. I believe addiction is a disease.

a. Strongly disagree

b. Disagree

c. Neither agree nor disagree

d. Agree

e. Strongly agree

11. Alternatives to opioids are not effective for treating chronic pain.

a. Strongly disagree

b. Disagree

c. Neither agree nor disagree

d. Agree

e. Strongly agree

12. Reducing opioid prescribing will end the opioid crisis.

a. Strongly disagree

b. Disagree

c. Neither agree nor disagree

d. Agree

e. Strongly agree

13. Persons in my profession need to be able to detach from patients with opioid addictions.

a. Strongly disagree

b. Disagree

c. Neither agree nor disagree

d. Agree

e. Strongly agree

14. Medication-assisted therapies (methadone or buprenorphine) are nothing more than substitutes for continued drug abuse.

a. Strongly disagree

b. Disagree

c. Neither agree nor disagree

d. Agree

e. Strongly agree

15. Opioid analgesics are effective for treating long-term chronic pain.

a. Strongly disagree

b. Disagree

c. Neither agree nor disagree

d. Agree

e. Strongly agree

16. I believe that opioid addiction is a symptom of poor moral character.

a. Strongly disagree

b. Disagree

c. Neither agree nor disagree

d. Agree

e. Strongly agree

17. I support needle exchange programs in the commuity.

a. Strongly disagree

b. Disagree

c. Neither agree nor disagree

d. Agree

e. Strongly agree

**On a scale from 0 to 100, where 0 is not a problem at all and 100 is an extremely severe problem, please indicate:**

18. Impact on Ohio’s adult population.

0 10 20 30 40 50 60 70 80 90 100

19. Impact on Ohio’s minors (<18 years of age).

0 10 20 30 40 50 60 70 80 90 100

20. Impact on Ohio’s minors (<18 years of age).

0 10 20 30 40 50 60 70 80 90 100

21. Impact on profession’s ability to provide quality patient care.

0 10 20 30 40 50 60 70 80 90 100

22. Impact on Ohio’s healthcare systems.

0 10 20 30 40 50 60 70 80 90 100

23. Impact on healthcare funding in Ohio.

0 10 20 30 40 50 60 70 80 90 100

24. Impact on Ohio’s rural communities.

0 10 20 30 40 50 60 70 80 90 100

25. Impact on Ohio’s suburban communities.

0 10 20 30 40 50 60 70 80 90 100

26. Impact on Ohio’s urban communities.

0 10 20 30 40 50 60 70 80 90 100

27. Opioid use has impacted my nuclear family.

a. Strongly disagree

b. Disagree

c. Neither agree nor disagree

d. Agree

e. Strongly agree

28. Opioid use has impacted my circle of friends.

a. Strongly disagree

b. Disagree

c. Neither agree nor disagree

d. Agree

e. Strongly agree

29. Opioid use has impacted someone in my training program.

a. Strongly disagree

b. Disagree

c. Neither agree nor disagree

d. Agree

e. Strongly agree

30. Opioid use has impacted the community where I permanently reside.

a. Strongly disagree

b. Disagree

c. Neither agree nor disagree

d. Agree

e. Strongly agree

31. I have treated a patient with an acute opioid overdose.

a. Strongly disagree

b. Disagree

c. Neither agree nor disagree

d. Agree

e. Strongly agree

32. I have had clinical encounters with patients who are drug seeking.

a. Strongly disagree

b. Disagree

c. Neither agree nor disagree

d. Agree

e. Strongly agree

33. Patient who use opioid illegally should be treated first as criminals.

a. Strongly disagree

b. Disagree

c. Neither agree nor disagree

d. Agree

e. Strongly agree

34. The thought of treating patients with opioid addiction causes me to feel stress.

a. Strongly disagree

b. Disagree

c. Neither agree nor disagree

d. Agree

e. Strongly agree

35. I hope to avoid working with patients who have an opioid addiction.

a. Strongly disagree

b. Disagree

c. Neither agree nor disagree

d. Agree

e. Strongly agree

36. My work upon graduation will likely involve dealing with patients who are addicted to opioids.

a. Strongly disagree

b. Disagree

c. Neither agree nor disagree

d. Agree

e. Strongly agree

37. I am confident that I will be able to deal effectively with patients who have an opioid addiction.

a. Strongly disagree

b. Disagree

c. Neither agree nor disagree

d. Agree

e. Strongly agree

38. I plan to complete the additional training necessary to provide Medication-Assisted Treatment for patients in need of methadone, naltrexone, or buprenorphine.

a. Strongly disagree

b. Disagree

c. Neither agree nor disagree

d. Agree

e. Strongly agree
